# Supplementary material for: Diagnosing Fatty Liver Disease: A Comparative Evaluation of Metabolic Markers, Phenotypes, Genotypes and Established Biomarkers
Source: PLOS journal article supplement (doi:10.1371/journal.pone.0076813), 2013-10-09
Supplement: S2 (10.1371/journal.pone.0076813.s002) [file journal.pone.0076813.s002]

**Table S2** Previously reported SNPs associated with fatty liver disease

| Chromosome | SNP ID      | Mapped Gene   | Risk Allele | Reference |
|------------|-------------|---------------|-------------|-----------|
| 1          | rs1801131   | MTHFR         | C           | [1-2]     |
| 1          | rs12137855* | LYPLAL1       | C           | [2]       |
| 2          | rs780094    | GCKR          | T           | [2]       |
| 2          | rs16944     | IL1B          | T           | [1-3]     |
| 4          | rs6843722   | CLOCK         | C           | [2]       |
| 6          | rs361525    | TNF- $\alpha$ | A           | [1-3]     |
| 7          | rs1800795   | IL6           | C           | [1-2]     |
| 8          | rs4240624   | PPP1R3B       | A           | [2]       |
| 8          | rs2645424   | FDFT1         | A           | [2]       |
| 11         | rs2854116*  | APOC3         | T           | [2]       |
| 12         | rs767870    | ADIPOR2       | T           | [1-2]     |
| 17         | rs7946      | PEMT          | A           | [1-3]     |
| 19         | rs2228603*  | NCAN          | T           | [2]       |
| 22         | rs738409*   | PNPLA3        | G           | [1-2]     |

\* SNPs which did not pass the quality controls prior to our analysis.

- 1 Anstee QM, Daly AK, Day CP (2011) Genetics of alcoholic and nonalcoholic fatty liver disease. *Semin Liver Dis* 31: 128-146.
- 2 Hernaez R (2011) Genetic factors associated with the presence and progression of nonalcoholic fatty liver disease: A narrative
- 3 Osterreicher CH, Brenner DA (2007) The genetics of nonalcoholic fatty liver disease. *Ann Hepatol* 6: 83-88.
